# Supplementary material
Source: Elsevier journal article supplement (https://www.sciencedirect.com/science/article/pii/S0870255119305943)
Supplement: mmc1 [file S0870255119305943:mmc1.docx]

## **Quadro Suplementar S1: Códigos ICD-9 CM considerados para a identificação dos episódios de internamento.**

| **Descrição** | **ICD 9** | **Designação** |
| --- | --- | --- |
| **Insuficiência cardíaca** | 402.01 | Doença cardíaca hipertensiva maligna com IC |
| 402.11 | Doença cardíaca hipertensiva benigna com IC |
| 402.91 | Doença cardíaca hipertensiva NE, com IC |
| 404.01 | Doença hipertensiva cardio-renal, maligna, com IC com DRC estadio I-IV ou NE |
| 404.03 | Doença hipertensiva cardio-renal, maligna, com IC, com DRC estadio V ou terminal |
| 404.11 | Doença hipertensiva cardio-renal, benigna, com IC com DRC estadio I-IV ou NE |
| 404.13 | Doença hipertensiva cardio-renal, benigna, com IC com DRC estadio V ou terminal |
| 404.91 | Doença hipertensiva cardio-renal, NE, com IC, com DRC estadio I-IV ou NE |
| 404.93 | Doença hipertensiva cardio-renal, NE com IC com DRC estadio V ou terminal |
| 428.XX | IC |
| **Doença do aparelho circulatório** | 390 a 459 | Doença do aparelho circulatório |
| **Procedimentos de substituição cardíaca** | 37.51 | Transplante cardíaco |
| 37.52 | Implantação de sistema de substituição cardíaca biventricular interno total |
| 37.53 | Substituição ou reparação da unidade torácica de sistema de substituição cardíaca (total) |
| 37.54 | Substituição ou reparação de outros componentes de sistema de substituição cardíaca (total) |
| 37.55 | Remoção de sistema de substituição cardíaca biventricular interno |
| **Implantação de sistemas de assistência cardíaca e circulatória** | 37.60 | Implantação ou colocação de sistema externo de assistência cardíaca biventricular |
| 37.61 | Implantação de balão pulsátil |
| 37.62 | Colocação de sistema de assistência circulatória extracorporal não-implantável |
| 37.63 | Reparação de sistema de assistência cardíaca |
| 37.64 | Remoção de sistema ou dispositivo cardíaco externo |
| 37.65 | Implantação de sistema de assistência cardíaca externa ventricular único (extracorporal) |
| 37.66 | Colocação de sistema de assistência cardíaca implantável |
| 37.67 | Implantação de sistema cardiomioestimulatório |
| 37.68 | Colocação de sistema de assistência cardíaca externo implantável |
| **Outros procedimentos cardiovasculares** | 00.50 | Implantação de CRT-P, sistema total |
| 00.51 | Implantação de CRT-D, sistema total |
| 00.52 | Implantação ou substituição do elétrodo |
| 00.53 | Implantação ou substituição de gerador CRT-P |
| 00.54 | Implantação ou substituição de gerador CRT-D |
| 00.56 | Colocação ou substituição de sensor de pressão implantável para monitorização intracardíaca |

IC: insuficiência cardíaca; DRC: doença renal crónica; NE: não especificada. CRT-D: Cardiac Resynchronization Therapy defibrillator CRT-P Cardiac Resynchronization Therapy pacemaker

## **Quadro Suplementar S2: Estimativa dos custos por Insuficiência cardíaca das Equipas de Cuidados Continuados Integrados (ECCI) e Rede Nacional de Cuidados Continuados Integrados (RNCCI).**

| **Estimativa dos custos do seguimento no contexto das Equipas de Cuidados Continuados Integrados (ECCI) (domicílio)** | | | |
| --- | --- | --- | --- |
| **Identificador** | **Variável** | **Valor** | **Fonte** |
| 1A | Peso ARS LVT nos ECCI | 30,19% | Relatório anual sobre o acesso a cuidados de saúde nos estabelecimentos do SNS e entidade convencionadas (2015) |
| 2A | Número de episódios em LVT com diagnóstico principal "Insuficiência Cardíaca" | 54 | ARS LVT (2013), Administração Central do Sistema de Saúde, IP, 2015* |
| 3A | Demora média de seguimento | 57,55 dias | ARS LVT (2013), Administração Central do Sistema de Saúde, IP, 2015* |
| 4A | Preço unitário | €9,98 | Estimativa dos autores baseada numa amostra de conveniência com microdados sobre a atividade das equipas de Cuidados Continuados e Integrados provenientes da área da ARS LVT. |
| 5A=1A/2Ax3Ax4A | Total custo dos doentes em ECCI | **€102.747** | Cálculo dos autores |
| **A estimativa dos custos de seguimento no contexto da Rede Nacional de Cuidados Continuados Integrados (RNCCI) (internamento)** | | | |
| **Identificador** | **Variável** | **Valor** | **Fonte** |
| 1B | Número total de Cuidados continuados em internamento | 7.160 | Relatório “Monitorização da RNCCI 2014” (Administração Central do Sistema de Saúde, IP, 2015) |
| 2B | Proporção de IC nos ECCI, assumida igual na RNCCI | 3,2% | ARS LVT (2013), Administração Central do Sistema de Saúde, IP, 2015* |
| 3B | Demora média de seguimento | 82,8 dias | Demora média ponderada pela distribuição das referenciações por doença CV, por tipologia de internamento, de acordo com os dados incluídos no documento "Monitorização da Rede Nacional de Cuidados Continuados Integrados (RNCCI 2014, p. 23). ACSS. Departamento de Gestão da Rede de Serviços e Recursos em Saúde. Núcleo Funcional da Rede Nacional de Cuidados Continuados Integrados, março 2015. |
| 4B | Preço unitário | €87,56 | Média ponderada Unidade de convalescença (105,46€), Unidade de cuidados paliativos (105,46€), Unidade de média duração e reabilitação (87,56€) e Unidade de longa duração e manutenção (60,19€); Portaria nº 262/20152. Ponderado pela distribuição das referenciações por doença cardiovascular por tipologia de internamento, de acordo com os dados incluídos no documento "Monitorização da Rede Nacional de Cuidados Continuados Integrados (RNCCI 2014, p. 23). ACSS. Departamento de Gestão da Rede de Serviços e Recursos em Saúde. Núcleo Funcional da Rede Nacional de Cuidados Continuados Integrados, março 2015. |
| 5B=1Bx2Bx3Bx4B | Total custo dos doentes internados em unidades da RNCCI | €1.684.039 | Cálculo dos autores |

*ARS LVT (2013), Administração Central do Sistema de Saúde, IP, 2015. Estes dados foram utilizados no estudo “O custo e a carga da fibrilhação auricular em Portugal” previamente realizado pelos autores do presente trabalho.

ECCI: Equipas de Cuidados Continuados Integrados; RNCCI: Rede Nacional de Cuidados Continuados Integrados; ARS LVT: Administração Regional de saúde. CV: Cardiovascular.

## **Quadro Suplementar S3: Estimativas dos custos unitários por deslocação.**

| **Meio de transporte** | **Proporção** | | **Preço** | |
| --- | --- | --- | --- | --- |
| **Transporte não urgente** | **Transporte urgente** | **Valor Unitário (€)** | **Fonte** |
| **Transporte público** | 46,5%* | 0,0% | 1,31 | Média simples do preço de bilhete em Coimbra, Lisboa e Porto. |
| **Carro** | 53,5% | 62,5% | 3,60 | O custo por Km em transporte próprio baseou-se no preço por Km (0,36€/Km) definido na Lei n.º 66-B/2012, de 31 de dezembro de 2012, que estabelece as normas relativas ao abono de ajudas de custo e de transporte pelas deslocações em serviço público. De acordo com o estudo do acesso aos cuidados de saúde primários do SNS da Entidade Reguladora da Saúde, a quase totalidade do território continental está a menos de 30 minutos de um centro de saúde ou extensão. A população residente nas áreas não cobertas não chega a representar 0,1% da população de Portugal continental (ERS, 2009). Assumiu-se que a distância média correspondente a este intervalo de tempo era de 10 Km. |
| **A pé** | 0% | 0% | 0 | Pressuposto |
| **Ambulância** | 0% | 37,5%* | 35,00 | Contabilidade Analítica INEM 2012 |
| **Preço médio** | €5,07 | €30,79 | - | Calculado (considerando ida e volta) |

*Média de um painel de peritos constituídos por sete médicos de cuidados de saúde primários.

## **Quadro Suplementar S****4: Taxa de emprego e custo diário médio associados à perda de produtividade dos doentes com insuficiência cardíaca** **em Portugal Continental (ano de 2014).**

| **Taxa de emprego (25-64 anos)** | | | |
| --- | --- | --- | --- |
|  | **Homens** | **Mulheres** | **Pressupostos** |
| **NYHA II** | 73,5% | 64,5% | Assume-se igual à taxa de emprego da população geral24. |
| **NYHA III** | 39,2% | 16,2% | Assume-se igual à taxa de emprego dos doentes com EAM21. |
| **Custo diário médio por trabalhador (25-64 anos)** | | | |
|  | **Homens** | **Mulheres** | **Pressupostos** |
| **Absenteísmo por consultas, MCDT e urgências*** | € 93,87 | € 73,64 | Estima-se que 50% das urgências são em período laboral. |
| **Absenteísmo por internamento/convalescença*** | € 59,11 | € 46,37 | A convalescença tem a mesma duração que o internamento12. |
| **Não participação no mercado de trabalho** | € 59,11 | € 46,37 | Apenas em doentes NYHA III com <65 anos. A participação no mercado de trabalho dos doentes com IC assume-se igual à dos doentes com história de EAM21. A não participação no mercado de trabalho é estimada com base na diferença entre a taxa de emprego da população com EAM e sem EAM (com a mesma distribuição por sexo e grupo etário21). |

* No caso do absenteísmo relacionado com o internamento/convalescença consultas ou urgência, o salário médio anual divide-se por 365 dado que estes eventos podem ocorrer em qualquer dia da semana. Nos outros casos consideram-se 230 dias úteis por ano.

NYHA: *New York Heart Association;* MCDT: Meios Complementares de Diagnóstico e Terapêutica; EAM: Enfarte Agudo do Miocardio; INS: Inquérito National de Saúde

Fonte: estimativa dos autores com base no INS 201421 e no Boletim Estatístico de agosto de 2015, Gabinete de Estratégia e Planeamento do Ministério do Trabalho, Solidariedade e da Segurança Social23.

## **Quadro Suplementar S5: Distribuição da prevalência de insuficiência cardíaca por sexo, grupo etário em Portugal Continental (ano de 2014).**

| **Grupo etário (anos)** | **Homens** | | **Mulheres** | | **Total** | |
| --- | --- | --- | --- | --- | --- | --- |
| **Nº** | **Taxa** | **Nº** | **Taxa** | **Nº** | **Taxa** |
| **25-49** | 29.254 | 1,8% | 16.889 | 1,0% | 46.143 | 1,4% |
| **50-59** | 14.473 | 2,2% | 25.954 | 3,6% | 40.427 | 2,9% |
| **60-69** | 44.522 | 8,1% | 45.945 | 7,2% | 90.468 | 7,6% |
| **70-79** | 55.008 | 14,3% | 58.118 | 11,5% | 113.126 | 12,7% |
| **80+** | 29.552 | 14,4% | 63.328 | 17,0% | 92.880 | 16,1% |
| **Total (25+)** | 172.809 | 5,0% | 210.235 | 5,3% | 383.043 | 5,2% |

Fonte: estimativa dos autores com base nos microdados do estudo EPICA11 e população residente em Portugal em 201424.

## **Quadro Suplementar S6: Distribuição da prevalência de insuficiência cardíaca por sexo, grupo etário e classe NYHA em Portugal Continental (ano de 2014).**

|  | **Classe NYHA*** | | | |
| --- | --- | --- | --- | --- |
| **Grupo etário (Anos)** | **I** | **II** | **III** | **IV** |
| **25-49** | 38,3% | 35,1% | 26,5% | 0,0% |
| **50-59** | 38,3% | 35,1% | 26,5% | 0,0% |
| **60-69** | 50,0% | 28,5% | 17,8% | 3,8% |
| **70-79** | 35,4% | 29,4% | 25,8% | 9,5% |
| **80+** | 21,6% | 36,9% | 31,5% | 9,9% |
| **Total** | 36,1% | 32,3% | 25,5% | 6,1% |

*Não se tendo verificado diferenças significativas na distribuição por estadio NYHA entre o sexo masculino e feminino, e dado o reduzido número de observações em algumas das células demográficas, optou-se pela análise conjunta de todos os indivíduos (sexo feminino e masculino) por grupo etário. Os casos sem classe NYHA inicialmente atribuída (nos microdados do estudo EPICA12) foram redistribuídos mantendo-se a proporção entre as classes.

Fonte: estimativa dos autores com base nos microdados do estudo EPICA12.

## **Quadro Suplementar S7: Custos indiretos por absenteísmo devido a consultas, meios complementares de diagnóstico e terapêutica, episódios de urgência sem internamento e internamento hospitalar/convalescença.**

| **Grupo etário (anos)** | **Custos por absenteísmo (€)** | | |
| --- | --- | --- | --- |
| **Homens** | **Mulheres** | **Total** |
| 25-44 | 2.627.264 | 597.277 | 3.224.541 |
| 45-65 | 9.352.846 | 4.550.780 | 13.903.626 |

## **Quadro Suplementar S8: Custos indiretos devidos à “não participação” no mercado de trabalho por IC.**

| **Grupo etário (anos)** | **Homens** | | **Mulheres** | |
| --- | --- | --- | --- | --- |
| **Nº doentes** | **Custo total (€)** | **Nº doentes** | **Custo total (€)** |
| 25-44 | 0 | 0 | 0 | 0 |
| 45-65 | 1.771 | 38.229.756 | 3.011 | 50.989.582 |
